# Supplementary material
Source: Springer Nature journal article supplement (https://www.springermedizin.de/resource/supplementary/13601_2014_1058_MOESM6_ESM.pdf/9678622)
Supplement: MOESM6 [file 9678622]

n=1 738

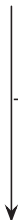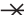

Published before January 2010 or  
not in the 100 most cited  
Duplicates

n=1 276  
n= 19

Title and abstract screening  
n=443

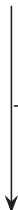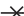

Not asthma prevalence  
Not on general population  
Not cross-sectional  
Duplicates

n= 98  
n= 31  
n= 21  
n= 8

Full-text screening  
n=285

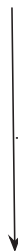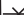

With no asthma definition  
Not asthma prevalence  
Not on general population  
Not cross-sectional  
Duplicates  
Not written in English, Portuguese or Spanish  
Asthma definition based on ICD

n= 107  
n= 28  
n= 13  
n= 11  
n= 5  
n= 1  
n= 3

Included papers  
n=117
